# Supplementary material for: Risk of cardiovascular disease in patients with classical Hodgkin lymphoma: a Danish nationwide register-based cohort study
Source: bioRxiv or medRxiv preprint supplement (doi:10.1101/2024.09.30.24314272), 2024-09-30

**Heart failure**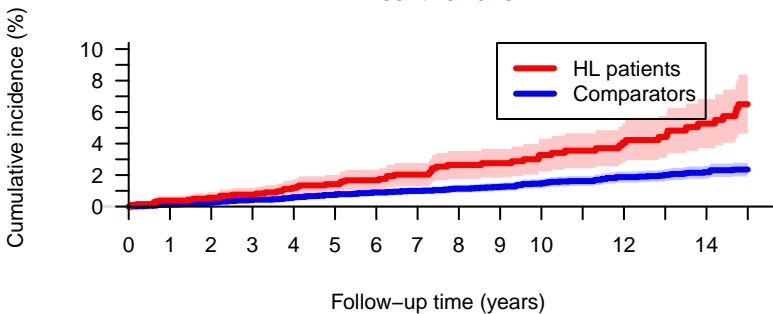**Ischemic heart disease**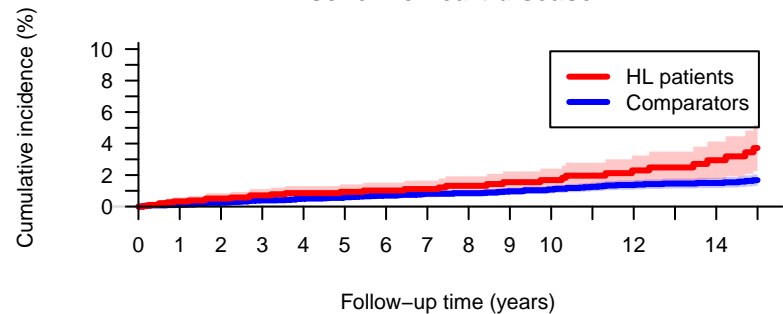**Acute coronary syndrome**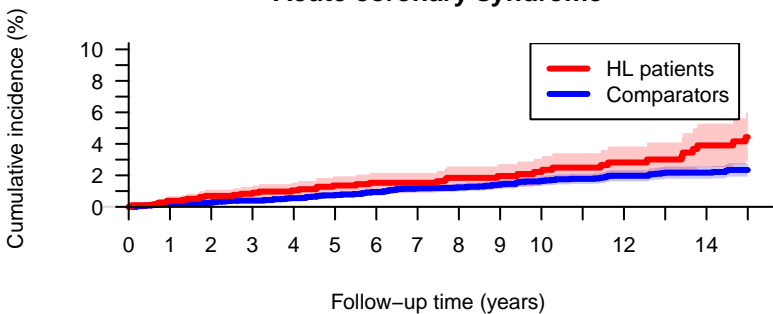**Coronary interventions (PCI or CABG)**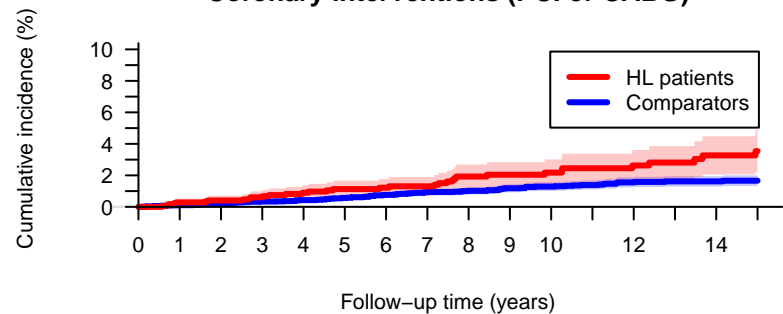**Aortic valve stenosis**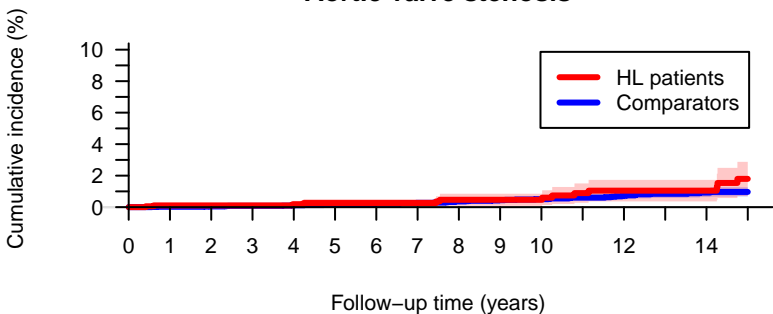**Atrial arrhythmia**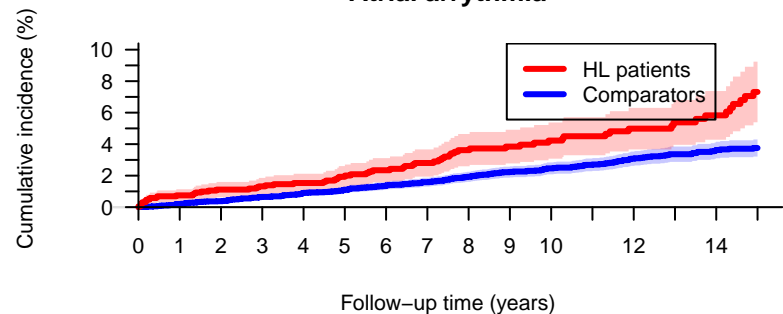**Ventricular arrhythmia or ICD-implantation**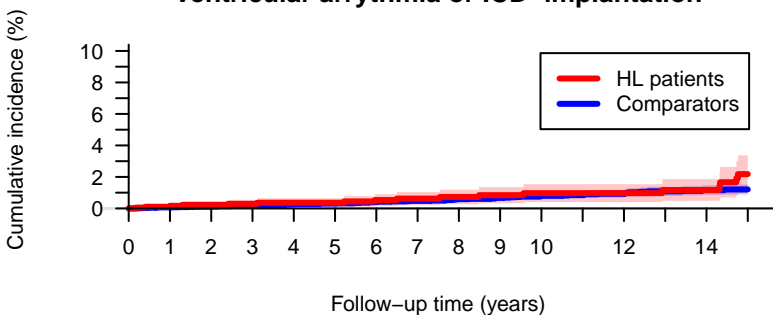

Supplement: Supplementary file [file media-2.pdf]
