# Supplementary material for: Risk of cardiovascular disease in patients with classical Hodgkin lymphoma: a Danish nationwide register-based cohort study
Source: bioRxiv or medRxiv preprint supplement (doi:10.1101/2024.09.30.24314272), 2024-09-30

| Clinicopathological feature                | HR    | Lower 95% | Upper 95% | P-value |
|--------------------------------------------|-------|-----------|-----------|---------|
| <b>Hypertension</b>                        |       |           |           |         |
| History of hypertension vs no hypertension | 1.84  | 1.49      | 2.27      | 0.003   |
| <b>Diabetes mellitus</b>                   |       |           |           |         |
| History of diabetes vs no diabetes         | 1.07  | 0.66      | 1.75      | 0.78    |
| <b>Sex</b>                                 |       |           |           |         |
| Male vs female sex                         | 1.93  | 1.59      | 2.34      | 0.003   |
| <b>Age groups</b>                          |       |           |           |         |
| 30–49 years vs 18–29 years                 | 2.88  | 1.72      | 4.81      | <0.001  |
| 50–69 years vs 18–29 years                 | 14.30 | 8.86      | 23.09     | <0.001  |
| >70 years vs 18–29 years                   | 33.74 | 20.37     | 55.88     | <0.001  |

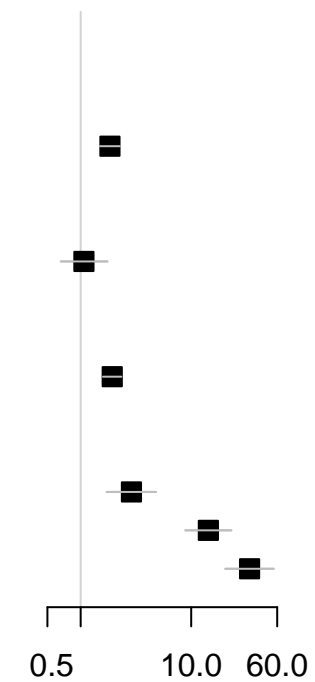

Supplement: Supplementary file [file media-3.pdf]
